# Supplementary material for: Assessment of the Atmosphere Composition after Washing, Gas-Freeing and Aerating Processes in Vessel Cargo Tanks
Source: Preprints.org preprint supplement (doi:10.20944/preprints202001.0311.v1), 2020-01-26
Supplement: Supplementary file 1 [file supplementary]

## Appendix B

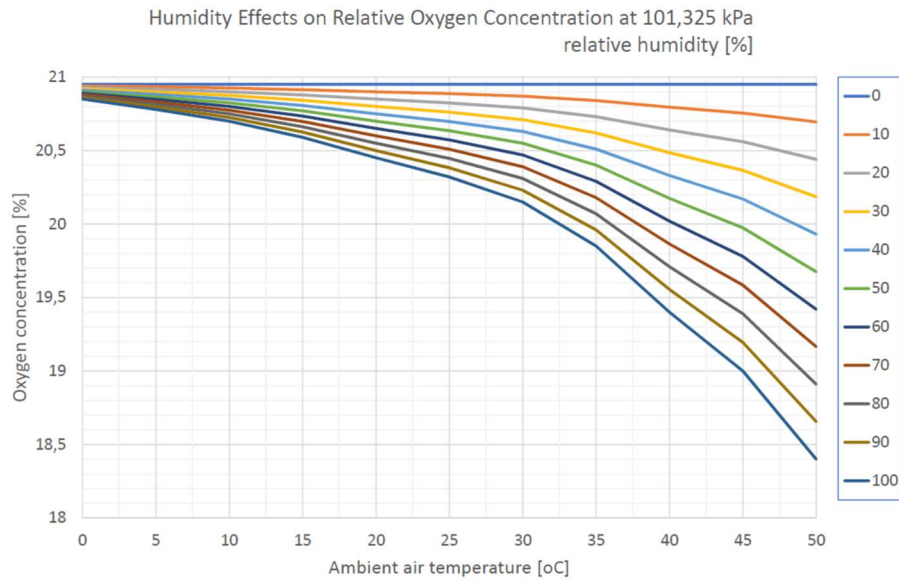

**Figure A1.** An influence of air humidity on the volume (mole) concentration of oxygen in dependence of ambient temperature at air pressure 101.325 Pa.

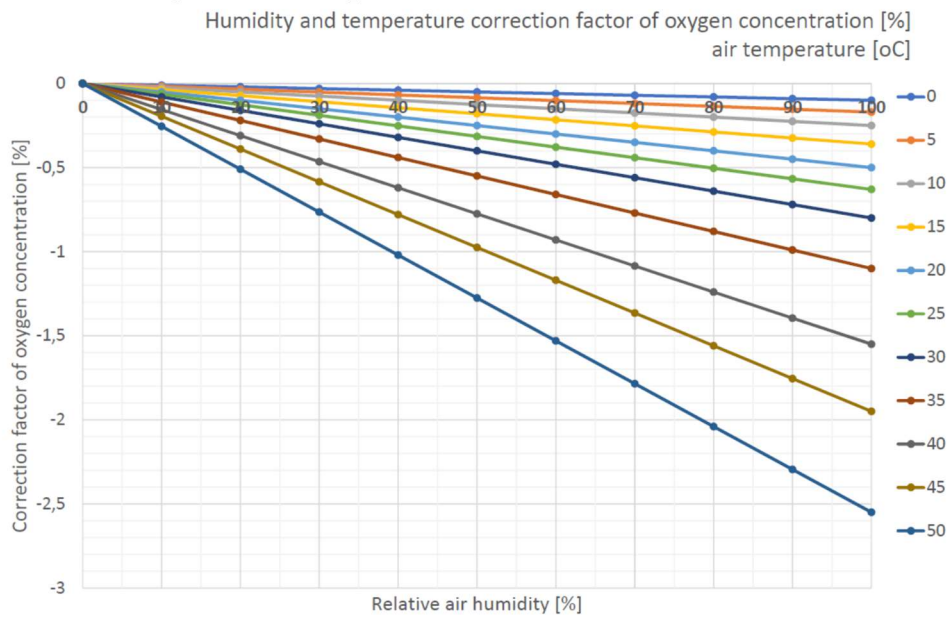

**Figure A2.** An influence of air temperature on the volume (mole) concentration of oxygen in dependence of humidity at air pressure 101.325 Pa.

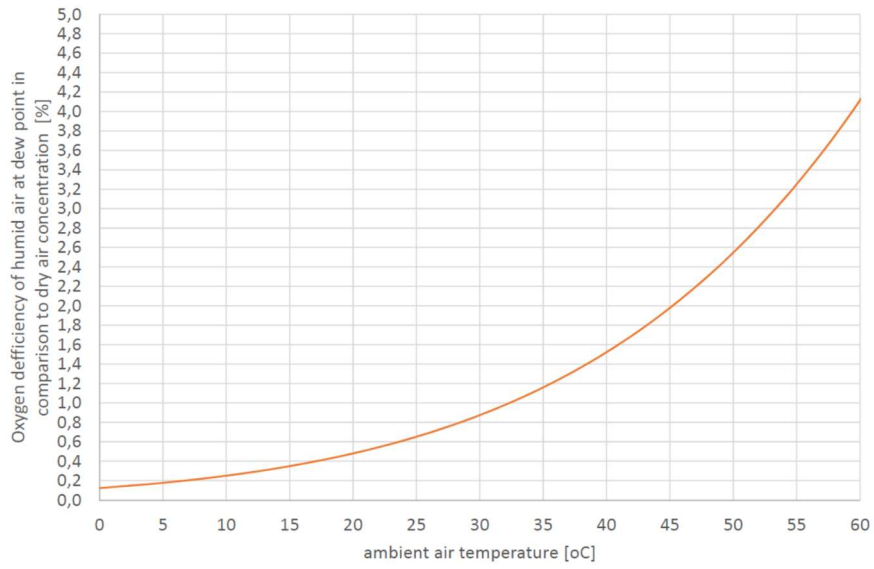

**Figure A3.** The oxygen deficiency in saturated air (at dew point) at pressure 101.325 Pa in dependence of ambient air temperature.

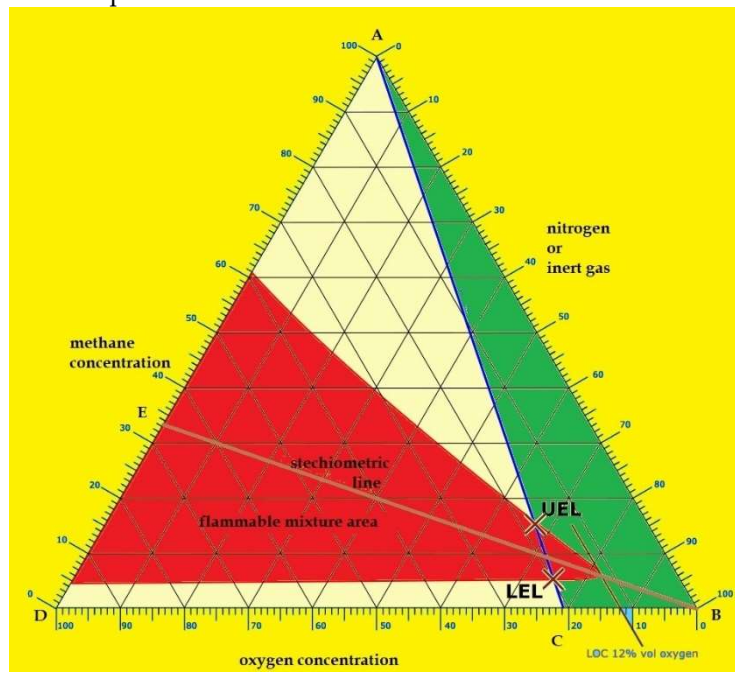

**Figure A4.** Diagram of methane-oxygen-inert gas mixtures.

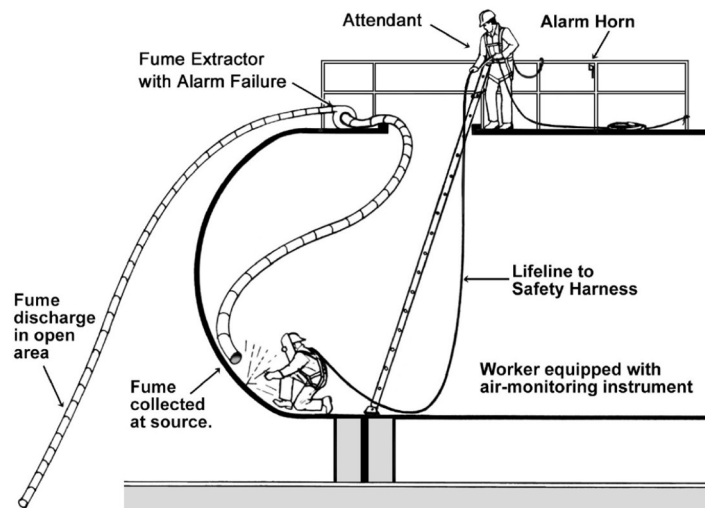

**Figure A5.** Essential conditions for allowing the work into enclosed spaces – the safety system.

**Table A1.** Dry air composition [1,18,19].

| Symbol          | Name           | Concentration<br>[%] [v/v] |
|-----------------|----------------|----------------------------|
| N <sub>2</sub>  | nitrogen       | 78.048                     |
| O <sub>2</sub>  | oxygen         | 20.947                     |
| Ar              | argon          | 0.934                      |
| CO <sub>2</sub> | carbon dioxide | 0.041                      |
| Ne              | neon           | 0.001818                   |
| He              | helium         | 0.000524                   |
| CH <sub>4</sub> | methane        | 0.00017                    |
|                 | other gases    | the rest to<br>100%        |

**Table A2.** Oxygen concentration in cargo tank atmosphere versus human health [6,14].

| Oxygen concentration<br>[%] [v/v] | The hazards for human health depending on oxygen concentration in the atmosphere                                                                                                                                                              |
|-----------------------------------|-----------------------------------------------------------------------------------------------------------------------------------------------------------------------------------------------------------------------------------------------|
| >22                               | <b>prohibition of entrance</b> , enriched atmosphere in oxygen, increased the fire hazard, the human reaction – state of excitation and euphoria;                                                                                             |
| 20.6÷22<br>or 20.6÷21             | <b>the possibility of human entrance</b> to enclosed space if no any additional hazards exist, human reaction – natural;                                                                                                                      |
| 19.5                              | <b>prohibition of entrance</b> , decreased oxygen concentration of the atmospheric air in tank, human reaction – speeding up the breathing, little difficulties in breathing, threat of loss the conscious during the work of high intensity; |
| 16                                | <b>prohibition of entrance</b> , significantly worsened the ability of stocktaking, difficulties in breathing, human reaction – the                                                                                                           |

---

possibility of quick conscious loss without extortion prohibition of  
entrance, breathing with strong difficulties;

<11

**human reaction – a loss of life in a few minutes.**

---
